# Supplementary material for: Lenvatinib, an angiogenesis inhibitor targeting VEGFR/FGFR, shows broad antitumor activity in human tumor xenograft models associated with microvessel density and pericyte coverage
Source: Vasc Cell. 2014 Sep 6;6:18. doi: 10.1186/2045-824X-6-18 (PMC4156793; doi:10.1186/2045-824X-6-18)
Supplement: Additional file 7 — Summary of human tumor specimens among 18 different types. ad-ca; adenocarcinoma, rcc; renal cell carcinoma, scc; squamous cell carcinoma. [file 2045-824X-6-18-S7.pdf]

## Additional file 7

| Tumor in the organ                                                     | N  | Diagnosis                                              | N |
|------------------------------------------------------------------------|----|--------------------------------------------------------|---|
| Stomach                                                                | 10 | poorly differentiated ad-ca                            | 4 |
|                                                                        |    | mucinous adenocarcinoma                                | 2 |
|                                                                        |    | moderately differentiated ad-ca                        | 2 |
|                                                                        |    | Signet ring cell                                       | 1 |
|                                                                        |    | Mucinous ad-ca & signet ring cell                      | 1 |
| Esophagus                                                              | 10 | moderately differentiated scc                          | 8 |
|                                                                        |    | well differentiated scc                                | 2 |
| Lung                                                                   | 10 | bronchogenic scc                                       | 7 |
|                                                                        |    | well differentiated ad-ca                              | 2 |
|                                                                        |    | large cell ca                                          | 1 |
| Colon                                                                  | 10 | rectum                                                 | 6 |
|                                                                        |    | transverse colon                                       | 2 |
|                                                                        |    | sigmoid colon                                          | 1 |
|                                                                        |    | cecum                                                  | 1 |
| Thyroid                                                                | 10 | papillary                                              | 9 |
|                                                                        |    | anaplastic                                             | 1 |
| Kidney                                                                 | 9  | clear cell rcc                                         | 5 |
|                                                                        |    | undifferentiated rcc                                   | 1 |
|                                                                        |    | granular cell rcc                                      | 1 |
|                                                                        |    | oncotic variant rcc                                    | 1 |
|                                                                        |    | rcc                                                    | 1 |
| Breast                                                                 | 10 | infiltrating duct carcinoma                            | 6 |
|                                                                        |    | infiltrating papillary carcinoma with signet ring cell | 1 |
|                                                                        |    | mixed infiltrating duct and lobular carcinoma          | 1 |
|                                                                        |    | medullary                                              | 1 |
|                                                                        |    | atypical medullary                                     | 1 |
| Neck, Bone, Jejunum, cecum, stomach, retroperitoneum, testis, Duodenum | 10 | malignant lymphoma                                     | - |
| Liver                                                                  | 10 | hepatocellular carcinoma                               | 8 |
|                                                                        |    | combined hepatocellular and cholangiocarcinoma         | 2 |
| Urinary bladder                                                        | 10 | transitional cell carcinoma                            | 6 |
|                                                                        |    | papillary transitional cell carcinoma                  | 3 |
|                                                                        |    | mucinous adenocarcinoma from urachal remnant           | 1 |
| Ovary                                                                  | 10 | papillary serous cystadeno carcinoma                   | 9 |
|                                                                        |    | mucinous cystadeno carcinoma                           | 1 |
| Pancreas                                                               | 10 | moderately differentiated ductal carcinoma             | 9 |
| Prostate                                                               | 9  | poorly differentiated ductal carcinoma                 | 1 |
|                                                                        |    | adenocarcinoma                                         | 9 |
| Endometrium                                                            | 10 | adenocarcinoma endometrioid type                       | 5 |
|                                                                        |    | adenocarcinoma                                         | 4 |
|                                                                        |    | adenocarcinoma extension from uterine cervix           | 1 |
| Gallbladder                                                            | 10 | well differentiated ad-ca                              | 4 |
|                                                                        |    | moderately differentiated ad-ca                        | 3 |
|                                                                        |    | poorly differentiated ad-ca                            | 1 |
|                                                                        |    | metastatic ad-ca from stomach                          | 1 |
|                                                                        |    | adenosquamous carcinoma                                | 1 |
| Head and neck (larynx, epiglottis, oral cavity)                        | 10 | well differentiated scc                                | 5 |
|                                                                        |    | moderately differentiated scc                          | 2 |
|                                                                        |    | poorly differentiated scc                              | 1 |
|                                                                        |    | adenoid cystic carcinoma                               | 1 |
|                                                                        |    | scc                                                    | 1 |
| Uterine cervix                                                         | 10 | scc                                                    | 9 |
|                                                                        |    | adenosquamous carcinoma                                | 1 |
| Skin (sole, toe, scalp, hip, abdomen, buttock, axilla, face), anus     | 9  | malignant melanoma                                     | - |
